# Supplementary material
Source: PubMed Central journal article supplement (PMC4078118)
Supplement: 10-1055-s-0033-1360263-sup_gf724.pdf [file 10-1055-s-0033-1360263-sup_gf724.pdf]

# Patientinnen und Methoden der PATH-Biobank – Eine Ressource für die Brustkrebsforschung

## Patients and Methods of the PATH Biobank – A Resource for Breast Cancer Research

### Autoren

A. Waldmann<sup>1</sup>, T. Anzeneder<sup>2</sup>, A. Katalinic<sup>1,3</sup>

### Institute

<sup>1</sup> Institut für Sozialmedizin und Epidemiologie, Lübeck

<sup>2</sup> Stiftung PATH, Augsburg

<sup>3</sup> Institut für Krebs Epidemiologie e. V., Lübeck

### Schlüsselwörter

- Mamma
- Epidemiologie
- Mammakarzinom

### Key words

- breast
- epidemiology
- breast cancer

### Zusammenfassung

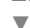

**Einleitung:** Die Stiftung PATH (Patients' Tumor Bank of Hope) sammelt in einer Biobank Blut, Tumor- und tumornahes Normalgewebe von Brustkrebspatienten und reichert diese systematisch mit Versorgungsdaten an.

**Material und Methodik:** Für Patientinnen aus den Diagnosejahren 2006–2009 wurden quantitative Daten mittels Mittelwerten und Standardabweichungen, qualitative Daten mit absoluten und relativen Häufigkeiten ausgewertet. Demografische und klinische Merkmale von Frauen, die unterschiedliche Anzahlen von Informationsquellen nutzen, wurden mittels ANOVA und  $\chi^2$ -Test auf statistische Signifikanz getestet. Der Benchmarkbericht des WBC und 2 DMP-Berichte werden zum Vergleich der onkologischen Versorgung genutzt.

**Ergebnisse:** Zu Forschungszwecken liegen Tumorgewebeproben in 59%, Normalgewebe in 62% und Blutserumproben in 92% der Fälle bereit. Von 3573 Frauen (Diagnose 2006–2009) wurden 2697 Frauen (75,5%) nachbefragt. Die Charakteristika der Follow-up-Patientinnen unterscheiden sich nicht relevant von allen Patientinnen. Die Ärztin bzw. der Arzt wird als wichtigste Quelle für Informationen zur Erkrankung genannt. Insbesondere junge Frauen nutzen mehrere Quellen und ziehen auch das Internet zur Informationsbeschaffung heran.

**Diskussion:** Verglichen mit Daten zur Therapie aus dem WBC und dem DMP Brustkrebs in Bayern bzw. Nordrhein sind die PATH-Patientinnen eine wenig selektierte Stichprobe. Die PATH-Biobank ist eine (noch) wenig genutzte Daten- und Probenquelle, die auf Anfrage und Begutachtung des Studienprotokolls zur Verfügung gestellt wird. Somit bietet sich die Möglichkeit, aktuelle Fragestellungen ohne aufwendige Rekrutierungsmaßnahmen zeitnah zu bearbeiten.

### Abstract

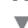

**Introduction:** The foundation PATH (Patients' Tumour Bank of Hope) collects in a tumour bank samples of blood, tumour, and tumour-near normal tissue from breast cancer patients and supplements them systematically with health-care data.

**Material and Methods:** For patients from the diagnosis years 2006–2009 quantitative data were evaluated with the help of mean values and standard deviations while for qualitative data absolute and relative incidences were assessed. Demographic and clinical features of women who used different numbers of information sources were tested for statistical significance by means of ANOVA and  $\chi^2$  tests. The benchmark report of the WBC and two DMP reports were used to compare oncological care.

**Results:** For research purposes tumour tissue samples are available for 59% of the cases, normal tissue for 62% and blood serum samples for 92%. From 3573 women (diagnoses 2006–2009), a total of 2697 women (75.5%) took part in follow-up. The characteristics of the follow-up patients did not relevantly differ from those of all the patients. The responsible physician was named as the most important source of information about the disease. Young women in particular consulted several sources and also used the internet to obtain information.

**Discussion:** Compared with data on therapy from WBC and the DMP breast cancer in Bavaria or, respectively, North Rhineland reports, the PATH patients represent an only slightly selected sample. The PATH biobank is a (still) poorly used data and sample source, which is made available upon request and positive evaluation of the study protocol. Thus, it is possible to address current questions in a short time without having to undertake extensive recruiting procedures.

eingereicht 12. 7. 2013  
revidiert 21. 10. 2013  
akzeptiert 19. 11. 2013

### Bibliografie

DOI <http://dx.doi.org/10.1055/s-0033-1360263>  
Geburtsh Frauenheilk 2014; 74: 1–9 © Georg Thieme Verlag KG Stuttgart · New York · ISSN 0016-5751

### Korrespondenzadresse

**Dr. Annika Waldmann**  
Institut für Sozialmedizin und Epidemiologie  
Ratzeberger Allee (Haus 50)  
23562 Lübeck  
[annika.waldmann@uksh.de](mailto:annika.waldmann@uksh.de)

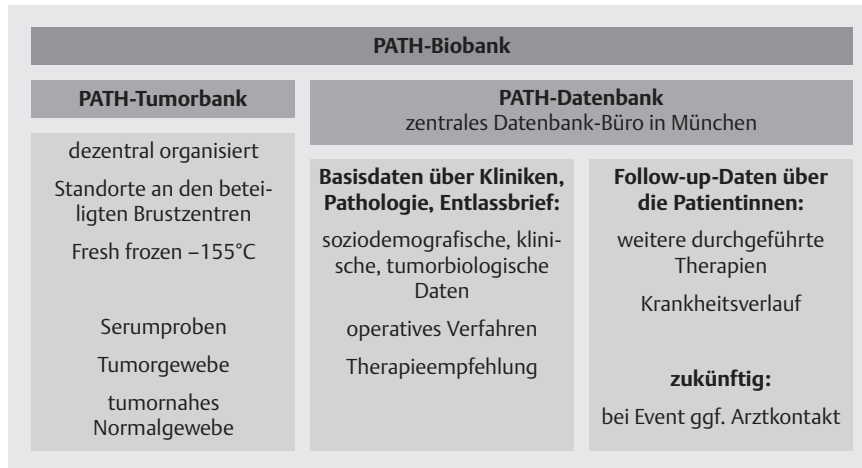

Abb. 1 Struktur der PATH-Biobank.

## Einleitung

▼  
Brustkrebs ist mit rund 78 500 Neuerkrankungsfällen (72 000 invasive und 6 500 In-situ-Tumoren) die häufigste Tumorerkrankung der Frau. Verglichen mit den frühen 1980er-Jahren (ca. 55 000 invasive Fälle) hat sich die Inzidenz um den Faktor 1,5 erhöht. Im zeitlichen Verlauf zeigt sich hingegen ein leichter, aber kontinuierlicher Rückgang der Brustkrebssterblichkeit. Aktuell versterben pro Jahr etwa 17 200 Frauen an Brustkrebs in Deutschland [1].

Die Diskrepanz zwischen steigenden Neuerkrankungszahlen und dem Rückgang in der Mortalität ist auf Fortschritte in Diagnostik und Therapie zurückzuführen. Durch optimierte Verfahren in der Bildgebung ist es heute möglich, rund 70% aller invasiven Fälle im prognostisch günstigen T1- oder T2-Stadium zu entdecken [1]. Zu den Fortschritten in der Therapie zählen u.a. die Entwicklung neuer Therapieverfahren wie die Sentinel-Lymphknoten-Entfernung oder auch Chemotherapeutika, die Antihormontherapie sowie weitere zielgerichtete Substanzen und die Einführung von Disease-Management-Programmen und zertifizierter Mammazentren, die zu einer besseren, schonenderen Versorgung und einem erhöhten Überleben beigetragen haben [1–4]. Dennoch gibt es im Bereich Mammakarzinom auch weiterhin noch viel Forschungs- und Handlungsbedarf, bspw. bei besonderen Subgruppen wie jungen Frauen oder Männern mit Brustkrebs, optimale Behandlung und Prognose von triple-negativem Brustkrebs, Aufklärung von Metastasierungswegen und -mechanismen, Erforschung von Therapieresistenzen oder Einsatz von Bisphosphonaten in der adjuvanten Situation. In den letzten Jahrzehnten wurden nicht nur in Deutschland Biobanken, die als „organisierte Sammlung von menschlichem biologischen Material und assoziiertem Datenmaterial zum Zwecke der Forschung“ definiert sind, implementiert. Die daraus resultierende Verfügbarkeit von Humanmaterial für die Grundlagenforschung hat dazu beigetragen, dass – insbesondere in der Onkologie – pathophysiologische Abläufe sowie Biomarker identifiziert werden konnten. Diese Marker wiederum können nicht nur einen Hinweis auf die Prognose, sondern auch darauf geben, an welcher Stelle im Organismus eine individualisierte und zielgerichtete Therapie ansetzen könnte [5, 6]. Im Jahr 2002 wurde die Stiftung PATH (Patients' Tumor Bank of Hope) gegründet. Ziel der Stiftung ist es, Blutserum, Tumor- und tumornahes Normalgewebe von Brustkrebspatienten zu sammeln und sicher einzulagern, dieses systematisch mit Daten zur Patientin anzureichern und der Forschung

zugänglich zu machen. Seit dem Jahr 2004 haben mehr als 5900 Frauen und Männer von dieser Möglichkeit Gebrauch gemacht. Die erhobenen Daten und Proben können zu Forschungszwecken auf Anfrage und nach Begutachtung eines aussagekräftigen Studienprotokolls zur Verfügung gestellt werden. Bislang wurden 8 Forschungsprojekte auf Basis von PATH durchgeführt (vgl. auch [www.stiftungPATH.org](http://www.stiftungPATH.org)) und z.T. schon publiziert [7–9]. In der vorliegenden Publikation soll die PATH-Biobank vorgestellt werden. Außerdem wird eine Deskription der seit dem Jahr 2006 eingeschlossenen Frauen und ein Vergleich mit anderen, in der Literatur beschriebenen Mammakarzinomkollektiven vorgenommen.

## Material und Methodik

### ▼ PATH-Biobank

PATH wurde im Jahr 2002 als Stiftung mit dem Ziel gegründet, eine Biobank für Brustkrebs aufzubauen. Die Biobank besteht aus einer zentralen Datenbank (angesiedelt bei der PATH-Stiftung) und dezentral organisierten Tumorbanken (angesiedelt in den Brustzentren; ► Abb. 1). Eine schriftliche, individuelle Einwilligung in die Einlagerung der Proben, zur Weitergabe der Daten zu Forschungszwecken, für spätere Befragung sowie für die Datenspeicherung und die pseudonymisierte Datenabgabe ist obligatorisch. Dieses Vorgehen wurde mit dem Bayerischen Landesdatenschutzbeauftragten abgestimmt und von der Ethikkommission der Universität Bonn zustimmend bewertet. Im Jahr 2004 konnten erstmals Proben in die Biobank an einem Standort eingelagert werden. Nach technischen Anpassungen und Überarbeitung der Standard Operating Procedures (SOP) kam zum Ende der Aufbauphase im Jahr 2005 ein weiterer Standort hinzu. Weitere Kooperationspartner konnten in den nachfolgenden Jahren gewonnen werden. Aktuell kooperieren 7 Brustzentren mit Standorten in Dortmund, Köln/Bonn, Herne/Bochum, Kassel, Marburg, Offenbach und Regensburg mit PATH. In den jeweiligen Zentren können Patienten nach Informed Consent Blutproben, Tumorgewebe und tumornahes Normalgewebe in Stickstofftanks (bei minus 155°C, Gasphasenlagerung, Fresh frozen) einlagern lassen, wobei jeweils die 1. Probe für die Patientin bzw. den Patienten eingelagert wird (Patientenprobe Tumor) und die restlichen Proben zum Zwecke der Forschung (Forschungsprobe Tumor) bereitgestellt werden. Nach dem Tod der Frau geht die Patientenprobe in das Eigentum von PATH über und steht somit

ebenfalls für die Forschung zur Verfügung. Zwischen den Patienten- und Forschungsproben besteht – mit Ausnahme der Eigentumsrechte – kein Unterschied. Die Verarbeitung, das Handling und die Probenbeschriftung unterliegen strikten Standard Operating Procedures (SOP), die von den Zentren eingehalten und in Monitorings gesichert werden. Für die Serumproben ist ein Mindestvolumen von 1 ml und für die Gewebeproben eine minimale Kantenlänge von 3 mm vorgesehen. Zusätzlich zu diesen Proben stellen die Brustzentren Arzt- und Pathologieberichte bereit, aus denen relevante Informationen zur Brustkrebserkrankung, Diagnose und Therapieempfehlung extrahiert werden (● **Abb. 1**). Die Datenextraktion wird von geschulten, ärztlich angeleiteten und zur Verschwiegenheit verpflichteten Mitarbeiterinnen des Datenbank-Büros vorgenommen. Bei unklarer Datenlage werden die Brustzentren bzw. weiterbetreuende Ärzte zwecks Klärung kontaktiert. Alle klinischen, tumorbiologischen und auch die patientenberichteten Follow-up-Informationen werden in der zentralen Datenbank (Standort: München) in pseudonymisierter Form gespeichert.

Ab Jahresbeginn 2008 wurde ein Konzept für die Nachverfolgung (Follow-up) der Frauen erarbeitet und abgestimmt, sodass erstmals im März 2009 Frauen mit Diagnosestellung von 2004 bis 2007 angeschrieben werden konnten, um die Nachbeobachtungsdaten (Follow-up-Daten) einzuholen. Begonnen wurde mit den chronologisch bereits am längsten eingelagerten Fällen. Bis zur Jahresmitte 2010 waren alle Frauen bis einschließlich Diagnose- und Einlagerungszeitpunkt Jahresmitte 2008 kontaktiert. Ab dieser Zeit erfolgte eine Kontaktierung 24 Monate nach Diagnosestellung.

Mit dem Follow-up-Anschreiben wurde über die Wichtigkeit der Nachbefragung aufgeklärt und ein Telefoninterview angekündigt. Weiterhin wurden die Frauen gebeten, einen von ihnen benannten Arzt von der Schweigepflicht zu entbinden, sodass dort ggf. weitere Informationen eingeholt werden können. Das Telefoninterview wurde von geschulten Mitarbeiterinnen auf Basis eines standardisierten Gesprächsleitfadens durchgeführt. Abgefragt wurden der Krankheitsverlauf sowie die Compliance mit der Therapie und der aktuelle Gesundheitszustand. Falls Patientinnen nicht telefonisch erreicht werden konnten, erhielten sie einen Fragebogen zu den oben genannten Fragestellungen.

Bei patientenberichtetem Auftreten eines Follow-up-Events (Rezidiv oder Metastasierung bzw. unklare oder unvollständige Angaben) soll der behandelnde Arzt kontaktiert und um Bestätigung des Befunds gebeten werden.

### Patientenauswahl

Es wurden weibliche Patientinnen aus den Diagnosejahren 2006–2009 berücksichtigt. Die Jahre 2004 und 2005 wurden aufgrund geringer Einschlusszahlen in der Aufbauphase der Biobank nicht berücksichtigt. Für die Jahre 2010 bis 2012 war die Datenerhebung und -erfassung zum Zeitpunkt der vorliegenden Auswertung noch nicht abgeschlossen (Datenbankschluss Juni 2012), sodass auch diese Patientinnen ausgeschlossen wurden. Weist eine Patientin metachrone Tumoren in der gleichen Brust auf oder liegt eine bilaterale Erkrankung vor, so wird in der Datenbank jeweils ein neuer „Fall“ angelegt. Für die vorliegende Auswertung wurden bei metachronen Mammakarzinomen die „primären“ Fälle ausgewählt, die zur ersten Gewebereinlagerung geführt haben. Bilateral erkrankte Frauen wurden mit je einem Fall für die betroffene Brust in der Auswertung aufgeführt.

### Statistische Analysen

Die Deskription erfolgt für das Gesamtkollektiv und für alle Frauen mit erfolgtem Follow-up. Quantitative Daten werden mittels Mittelwerten und Standardabweichungen, qualitative Daten mit absoluten und relativen Häufigkeiten abgebildet. Selbstberichtete Therapieverfahren werden mit Daten aus dem Benchmarkingbericht des Westdeutschen Brust-Centrums (WBC) 2009 [10] und 2 DMP-Qualitätssicherungsberichten [11,12] verglichen. Die Angaben zur Therapiehäufigkeit werden mit 95%-Konfidenzintervallen nach Altman [13] berichtet.

Statistische Unterschiede hinsichtlich soziodemografischer und klinischer Merkmale zwischen Frauen, die unterschiedliche Anzahlen von Informationsquellen nutzen, wurden mittels ANOVA und  $\chi^2$ -Test überprüft.

### Ergebnisse

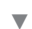

#### Patientinnenkollektiv

Für den Diagnosezeitraum 2006–2009 sind 4071 Patientinnen in PATH aufgenommen worden. Zwei Zentren trugen mit je 11% der Patientinnen zum Kollektiv bei, auf die anderen Zentren entfielen 4, 15, 16, 19 bzw. 23% der rekrutierten Patientinnen. Von diesen wurden bereits 3573 Frauen im Rahmen des Follow-ups (Aufnahme in die PATH-Datenbank vor mindestens 2 Jahren) kontaktiert. Die mittlere Differenz zwischen Diagnosedatum und Zeitpunkt des Follow-up-Kontakts beträgt 27,3 (SD: 4,9) Monate. Lediglich 368 Frauen hatten bei Aufnahme in die Biobank einer Nachbeobachtung widersprochen. Im Zeitraum der Aufnahme in PATH bis zum Nachbefragungszeitpunkt waren 143 Frauen verstorben (31 mit Todesursache Mammakarzinom, 6 mit anderer Todesursache als Mammakarzinom, 106 mit unklarer Todesursache). Bei der Nachbefragung berichteten 48 Frauen ein lokoregionäres Rezidiv und 114 Frauen berichteten Metastasen. Insgesamt standen 2697 Frauen ( $2697/3573 = 75,5\%$ ;  $2697/[3573-143] = 78,6\%$ ) für eine Nachbefragung zur Verfügung. Zwischen der Subgruppe der „Patientinnen mit Follow-up“ und allen aufgenommenen Patientinnen gibt es bezogen auf die erhobenen, persönlichen und klinischen Merkmale keine klinisch relevanten Unterschiede. So liegt das mittlere Erkrankungsalter in beiden Gruppen bei rund 60 Jahren und etwa 7% weisen in der Eigenanamnese eine Brustkrebserkrankung auf. Rund 93% der Frauen haben einen Tumor im Tumorstadium T1 oder T2 und nur 3,6% weisen Fernmetastasen auf. Östrogenrezeptorpositiv sind 81%, progesteronrezeptorpositiv sind 71% und Her2/neu-Rezeptor-positiv sind rund 13% der Frauen (● **Tab. 1**).

#### Onkologische Versorgung

Rund 78% aller PATH-Patientinnen berichteten eine brusterhaltende Therapie. Werden nur die Frauen mit T1-Tumor betrachtet, so steigt der Wert auf 86,5% an. Eine Nachbestrahlung bei brusterhaltender Therapie berichteten 90,4% der PATH-Patientinnen. Eine Chemotherapie bei Lymphknotenbefall und negativem Hormonrezeptorstatus wird von 70,9% der PATH-Patientinnen berichtet. Eine Bisphosphonattherapie wurde nur von 17% angegeben (● **Tab. 2**).

#### Informationsquellen

Im Rahmen des Follow-ups wurde nach Informationsquellen zum Thema Krebs gefragt (Wortlaut: „Wie und wo erhalten Sie Informationen über Brustkrebs? Welche Medien oder Quellen nutzen Sie, um sich über die eigene Krankheit zu informieren?“).

**Tab. 1** Klinische und anamnestische Daten aller PATH-Patientinnen und derer mit Follow-up.

|                                        | alle Patientinnen<br>(n = 4071) | Follow-up-Patientinnen<br>(n = 2697) |
|----------------------------------------|---------------------------------|--------------------------------------|
| Alter bei Diagnose                     |                                 |                                      |
| ▶ Mean ± SD                            | 59,8 ± 12,1                     | 60,1 ± 11,5                          |
| Altersgruppen                          |                                 |                                      |
| ▶ < 40                                 | 199 (4,9)                       | 98 (3,6)                             |
| ▶ 40–74                                | 3426 (84,2)                     | 2333 (86,5)                          |
| ▶ ≥ 75 Jahre                           | 446 (11,0)                      | 266 (9,9)                            |
| Eigenanamnese (früheres Mammakarzinom) |                                 |                                      |
| ▶ ja                                   | 303 (7,4)                       | 199 (7,4)                            |
| ▶ nein                                 | 3745 (92,0)                     | 2483 (92,1)                          |
| ▶ unklar                               | 23 (0,5)                        | 15 (0,5)                             |
| Menopausenstatus                       |                                 |                                      |
| ▶ prämenopausal                        | 653 (16,0)                      | 404 (15,0)                           |
| ▶ perimenopausal                       | 90 (2,2)                        | 52 (1,9)                             |
| ▶ postmenopausal*                      | 2818 (69,2)                     | 1926 (71,4)                          |
| ▶ unklar                               | 510 (12,5)                      | 315 (11,7)                           |
| TNM-T**                                |                                 |                                      |
| ▶ T1                                   | 2224 (63,5)                     | 1549 (65,4)                          |
| ▶ T2                                   | 1085 (31,0)                     | 713 (30,1)                           |
| ▶ T3                                   | 112 (3,2)                       | 67 (2,8)                             |
| ▶ T4                                   | 57 (1,6)                        | 25 (1,1)                             |
| ▶ Tx                                   | 24 (0,7)                        | 15 (0,6)                             |
| TNM-N**                                |                                 |                                      |
| ▶ N0                                   | 2284 (65,2)                     | 1586 (66,9)                          |
| ▶ N1                                   | 797 (22,8)                      | 530 (22,4)                           |
| ▶ N2                                   | 217 (6,2)                       | 135 (5,7)                            |
| ▶ N3                                   | 131 (3,7)                       | 75 (3,2)                             |
| ▶ Nx                                   | 73 (2,1)                        | 43 (1,8)                             |
| TNM-M**                                |                                 |                                      |
| ▶ M0                                   | 3206 (91,5)                     | 2199 (92,8)                          |
| ▶ M1                                   | 103 (2,9)                       | 46 (1,9)                             |
| ▶ Mx                                   | 193 (5,5)                       | 124 (5,2)                            |
| Resektionsrand**                       |                                 |                                      |
| ▶ R0                                   | 3396 (97,0)                     | 2310 (97,5)                          |
| ▶ R1                                   | 47 (1,3)                        | 24 (1,0)                             |
| ▶ R2                                   | 4 (0,1)                         | 2 (0,1)                              |
| ▶ Rx                                   | 55 (1,6)                        | 33 (1,4)                             |
| Anzahl befallener Lymphknoten**        |                                 |                                      |
| ▶ Mean ± SD (min. – max.)              | 1,34 ± 3,72 (0–59)              | 1,13 ± 3,06 (0–36)                   |
| Anzahl entfernter Lymphknoten**        |                                 |                                      |
| ▶ Mean ± SD (min. – max.)              | 7,60 ± 7,45 (0–61)              | 7,35 ± 7,18 (0–58)                   |
| Östrogenrezeptorstatus                 |                                 |                                      |
| ▶ positiv                              | 3275 (80,4)                     | 2209 (81,9)                          |
| ▶ negativ                              | 753 (18,5)                      | 457 (16,9)                           |
| ▶ unklar                               | 43 (1,1)                        | 31 (1,1)                             |
| Progesteronrezeptorstatus              |                                 |                                      |
| ▶ positiv                              | 2684 (70,4)                     | 1943 (72,0)                          |
| ▶ negativ                              | 1163 (28,6)                     | 723 (26,8)                           |
| ▶ unklar                               | 44 (1,1)                        | 31 (1,1)                             |
| Her2/neu-Status***                     |                                 |                                      |
| ▶ positiv                              | 524 (12,9)                      | 331 (12,3)                           |
| ▶ negativ                              | 3488 (85,7)                     | 2326 (86,2)                          |
| ▶ unklar                               | 59 (1,4)                        | 40 (1,5)                             |
| triple-negativ                         |                                 |                                      |
| ▶ ja                                   | 465 (11,4)                      | 281 (10,4)                           |
| ▶ nein                                 | 3540 (87,0)                     | 2369 (87,8)                          |
| ▶ unklar                               | 66 (1,6)                        | 47 (1,7)                             |

\* Angabe in Arztbrief oder Patientin älter als 60 Jahre. \*\* Selektion: primäres Mammakarzinom und adjuvante Therapie; n gesamt = 3502 bzw. n Follow-up = 2369.

\*\*\* Definition Her2/neu-Positivität: Ergebnis FISH/SISH/CISH-Test. Falls dieser nicht vorliegt, wird auf das Ergebnis des IHC-Tests zurückgegriffen: 3+ wird als positiv gewertet, 0–2+ wird als negativ gewertet – es sei denn, die Patientin erhält bei IHC2+ im Brustzentrum eine Empfehlung zur Herceptin-Therapie, dann wird der Her2/neu-Status als positiv gewertet.

1887 Patientinnen haben eine gültige Antwort auf diese Frage(n) gegeben und insgesamt 4414 Nennungen gemacht (Mittelwert: 2,2 Informationsquellen pro Frau, Standardabweichung: 1,2). 58,1% der befragten Frauen geben 1 oder 2 Quellen an, weitere 26,9% nutzen 3 Informationsquellen und die restlichen 15,0% nutzen 4 oder mehr Informationsquellen. Generell gilt, dass mehr Quellen genutzt wurden, wenn die Patientin jünger war ( $p < 0,001$ , ANOVA) und der Tumor in die Lymphknoten gestreut hatte ( $p = 0,013$ ,  $\chi^2$ ), wohingegen die Art der Operation oder auch das Vorhandensein von Fernmetastasen keinen Einfluss auf die Anzahl der genutzten Quellen zeigten. Die am häufigsten genannte Informationsquelle war die Ärztin oder der Arzt (38,1% aller Nennungen; bei 89,2% aller Patientinnen) gefolgt von Informationsbroschüren (21,4 bzw. 50,0%; **Tab. 3**).

### Serum- und Gewebeproben

Blutserumproben für die Patienten bzw. für Forschungszwecke liegen von 95 bzw. 92% der Frauen vor. Eine für die Patientin treuhänderisch verwahrte Tumorgewebeprobe liegt für ca. 73% und Forschungs-Tumorgewebeproben liegen für ca. 59% der Patientinnen vor (**Abb. 2**). Zusätzlich wurde auch tumornahes Normalgewebe aus dem OP-Präparat in 62% der Fälle für die Forschung eingelagert.

Ein Großteil der Patientinnen wies einen lokal begrenzten Tumor auf (**Tab. 1**). In **Abb. 3** ist die Einlagerung der Tumorproben differenziert nach Tumorstadium aufgeführt. Während für die höheren Tumorstadien (T2/T3/T4) für mehr als 87% der Fälle eine Forschungsprobe des Tumors eingelagert werden konnte, trifft dies bedingt durch die Menge des vorhandenen Tumormaterials nur auf 18,8% (pT1a), 25,3% (pT1b) bzw. 64,1% (pT1c) der kleineren Tumorstadien zu.

### Diskussion

Die Stiftung PATH (Patients' Tumor Bank of Hope) wurde im Jahr 2002 gegründet. Aktuell kooperieren 7 Kliniken und schließen Brustkrebspatienten nach Informed Consent in die PATH-Biobank ein. Die Probensammlung umfasst Blut, Tumor- und tumornahes Normalgewebe. In der Datenbank sind klinische, anamnestische und therapeutische Daten gespeichert. In teils telefonischen, teils schriftlichen Befragungen werden rund 2 Jahre nach Diagnosestellung Angaben zur Compliance mit der Therapie, zum Krankheitsverlauf und zum Überleben erhoben.

### Das PATH-Kollektiv

In Deutschland liegt das mittlere Erkrankungsalter von Brustkrebspatientinnen bei rund 65 Jahren [1]. Die PATH-Patientinnen sind im Mittel etwa 5 Jahre jünger und gleichen damit eher Frauen, die an 2 in Deutschland durchgeführten onkologischen Versorgungsforschungsstudien teilgenommen hatten (OVIS-Studie: mittleres Erkrankungsalter: 59 Jahre [14]; VERDI-Studie: mittleres Erkrankungsalter: 57 Jahre [15]). Rund 65% der PATH-Patientinnen weisen ein T1-Stadium und weitere 30% ein T2-Stadium auf. Damit ist die Tumorstadienverteilung deutlich günstiger als die aller in Deutschland erkrankten Frauen [1] bzw. leicht günstiger als die aller in der OVIS-Studie befragten Frauen [14] und der Frauen aus den WBC-Kooperationskliniken [10]. Der Anteil an fernmetastasierten Patientinnen lag nur leicht höher als in der saarländischen VERDI-Studie (1,6%) [15]. Es konnte gezeigt werden, dass tendenziell eher jüngere Frauen sowie Frauen mit günstigerem Tumorstadium bereit sind, an Forschungsprojekten

**Tab. 2** Therapiedaten der PATH-Patientinnen mit Follow-up sowie Indikatoren aus dem WBC-Benchmarkbericht 2009 und DMP-Berichten aus dem Jahr 2010 (Nordrhein) bzw. 2011 (Bayern).

|                                                                                       | PATH<br>absolute und<br>relative Häufig-<br>keiten (n = 2 697) | PATH<br>relative Häufig-<br>keit bezogen auf<br>die gültigen Ant-<br>worten (ja/nein)<br>(95%-KI) | Benchmark-<br>bericht WBC<br>Anzahl<br>relative Häufig-<br>keit (95%-KI) [10] | Qualitätsbericht<br>DMP Brustkrebs<br>Bayern<br>Anzahl<br>relative Häufig-<br>keit (95%-KI) [11] | Qualitätsbericht<br>DMP Brustkrebs<br>Nordrhein<br>Anzahl<br>relative Häufig-<br>keit (95%-KI) [12] |
|---------------------------------------------------------------------------------------|----------------------------------------------------------------|---------------------------------------------------------------------------------------------------|-------------------------------------------------------------------------------|--------------------------------------------------------------------------------------------------|-----------------------------------------------------------------------------------------------------|
| brusterhaltende Therapie (BET)                                                        |                                                                | n = 2 684                                                                                         | n = 36 369                                                                    |                                                                                                  |                                                                                                     |
| ▶ ja                                                                                  | 2 096 (77,7)                                                   | 78,1 (76,5; 79,7)                                                                                 | 72,0 (71,5; 72,5)                                                             | –                                                                                                | –                                                                                                   |
| ▶ nein                                                                                | 588 (21,8)                                                     |                                                                                                   |                                                                               |                                                                                                  |                                                                                                     |
| ▶ unklar                                                                              | 13 (0,5)                                                       |                                                                                                   |                                                                               |                                                                                                  |                                                                                                     |
| T1-Tumor und BET                                                                      |                                                                | n = 1 723                                                                                         | n = 17 772                                                                    | n = 3 896                                                                                        | n = 7 496                                                                                           |
| ▶ ja                                                                                  | 1 491 (86,3)                                                   | 86,5 (84,9; 88,1)                                                                                 | 85,0 (84,5; 85,5)                                                             | 88,0 (87,0; 89,0)                                                                                | 82,2 (81,3; 83,1)                                                                                   |
| ▶ nein                                                                                | 232 (13,4)                                                     |                                                                                                   |                                                                               |                                                                                                  |                                                                                                     |
| ▶ unklar                                                                              | 4 (0,2)                                                        |                                                                                                   |                                                                               |                                                                                                  |                                                                                                     |
| T1/T2-Tumor und BET                                                                   |                                                                | n = 2 504                                                                                         |                                                                               |                                                                                                  |                                                                                                     |
| ▶ ja                                                                                  | 2 031 (80,8)                                                   | 81,1 (79,6; 82,6)                                                                                 | –                                                                             | –                                                                                                | –                                                                                                   |
| ▶ nein                                                                                | 473 (18,8)                                                     |                                                                                                   |                                                                               |                                                                                                  |                                                                                                     |
| ▶ unklar                                                                              | 9 (0,4)                                                        |                                                                                                   |                                                                               |                                                                                                  |                                                                                                     |
| Strahlentherapie                                                                      |                                                                | n = 2 473                                                                                         |                                                                               |                                                                                                  |                                                                                                     |
| ▶ ja                                                                                  | 2 194 (88,3)                                                   | 88,7 (87,5; 89,9)                                                                                 | –                                                                             | –                                                                                                | –                                                                                                   |
| ▶ nein                                                                                | 279 (11,3)                                                     |                                                                                                   |                                                                               |                                                                                                  |                                                                                                     |
| ▶ unklar                                                                              | 224 (9,0)                                                      |                                                                                                   |                                                                               |                                                                                                  |                                                                                                     |
| Strahlentherapie nach BET                                                             |                                                                | n = 1 955                                                                                         | n = 21 212                                                                    | n = 1 070                                                                                        | n = 8 967                                                                                           |
| ▶ ja                                                                                  | 1 894 (96,4)                                                   | 90,4 (89,1; 91,7)                                                                                 | 85,0 (84,5; 85,5)                                                             | 85,0 (82,9; 87,1)                                                                                | 62,0 (61,0; 63,0)                                                                                   |
| ▶ nein                                                                                | 61 (3,1)                                                       |                                                                                                   |                                                                               |                                                                                                  |                                                                                                     |
| ▶ unklar                                                                              | 141 (7,2)                                                      |                                                                                                   |                                                                               |                                                                                                  |                                                                                                     |
| Chemotherapie                                                                         |                                                                | n = 2 252                                                                                         |                                                                               |                                                                                                  |                                                                                                     |
| ▶ ja                                                                                  | 1 160 (51,5)                                                   | 51,5 (49,4; 53,6)                                                                                 | –                                                                             | –                                                                                                | –                                                                                                   |
| ▶ nein                                                                                | 1 092 (48,3)                                                   |                                                                                                   |                                                                               |                                                                                                  |                                                                                                     |
| ▶ unklar                                                                              | 445 (19,7)                                                     |                                                                                                   |                                                                               |                                                                                                  |                                                                                                     |
| Chemotherapie bei Vorliegen<br>von Nodalpositivität und<br>Hormonrezeptor-Negativität |                                                                | n = 101                                                                                           | n = 6 800                                                                     | n = 198                                                                                          | n = 684                                                                                             |
| ▶ ja                                                                                  | 95 (94,0)                                                      | 70,9 (62,0; 79,8)                                                                                 | 75,0 (74,0; 76,0)                                                             | 78,0 (72,2; 83,8)                                                                                | 78,1 (75,0; 81,2)                                                                                   |
| ▶ nein                                                                                | 6 (5,9)                                                        |                                                                                                   |                                                                               |                                                                                                  |                                                                                                     |
| ▶ unklar                                                                              | 33 (32,1)                                                      |                                                                                                   |                                                                               |                                                                                                  |                                                                                                     |
| antihormonelle Therapie                                                               |                                                                | n = 2 427                                                                                         |                                                                               |                                                                                                  |                                                                                                     |
| ▶ ja                                                                                  | 2 042 (84,1)                                                   | 75,7 (74,0; 77,4)                                                                                 | –                                                                             | –                                                                                                | –                                                                                                   |
| ▶ nein                                                                                | 385 (15,8)                                                     |                                                                                                   |                                                                               |                                                                                                  |                                                                                                     |
| ▶ unklar                                                                              | 270 (11,1)                                                     |                                                                                                   |                                                                               |                                                                                                  |                                                                                                     |
| antihormonelle Therapie bei<br>Hormonrezeptorpositivität                              |                                                                | n = 2 054                                                                                         | n = 27 956                                                                    | n = 916                                                                                          | n = 10 328                                                                                          |
| ▶ ja                                                                                  | 1 984 (96,6)                                                   | 87,5 (86,1; 88,9)                                                                                 | 97,0 (96,8; 97,2)                                                             | 91,0 (89,2; 92,9)                                                                                | 69,9 (69,0; 70,8)                                                                                   |
| ▶ nein                                                                                | 70 (3,4)                                                       |                                                                                                   |                                                                               |                                                                                                  |                                                                                                     |
| ▶ unklar                                                                              | 213 (10,4)                                                     |                                                                                                   |                                                                               |                                                                                                  |                                                                                                     |
| Herceptin                                                                             |                                                                | n = 2 431                                                                                         |                                                                               |                                                                                                  |                                                                                                     |
| ▶ ja                                                                                  | 254 (10,4)                                                     | 9,4 (8,2; 10,6)                                                                                   | –                                                                             |                                                                                                  |                                                                                                     |
| ▶ nein                                                                                | 2 177 (89,5)                                                   |                                                                                                   |                                                                               |                                                                                                  |                                                                                                     |
| ▶ unklar                                                                              | 266 (10,9)                                                     |                                                                                                   |                                                                               |                                                                                                  |                                                                                                     |
| Herceptin bei Her2-neu-Positivität                                                    |                                                                | n = 300                                                                                           |                                                                               |                                                                                                  |                                                                                                     |
| ▶ ja                                                                                  | 225 (75,0)                                                     | 68,0 (62,7; 73,3)                                                                                 | –                                                                             |                                                                                                  |                                                                                                     |
| ▶ nein                                                                                | 75 (25,0)                                                      |                                                                                                   |                                                                               |                                                                                                  |                                                                                                     |
| ▶ unklar                                                                              | 31 (10,3)                                                      |                                                                                                   |                                                                               |                                                                                                  |                                                                                                     |
| Bisphosphonattherapie                                                                 |                                                                | n = 2 432                                                                                         |                                                                               | n = 164                                                                                          | n = 518                                                                                             |
| ▶ ja                                                                                  | 414 (16,9)                                                     | 17,0 (15,5; 18,5)                                                                                 | –                                                                             | 82,0 (76,1; 87,9)                                                                                | 88,8 (86,1; 91,5)                                                                                   |
| ▶ nein                                                                                | 2 018 (83,0)                                                   |                                                                                                   |                                                                               |                                                                                                  |                                                                                                     |
| ▶ unklar                                                                              | 265 (10,9)                                                     |                                                                                                   |                                                                               |                                                                                                  |                                                                                                     |

Besonderheiten WBC: Planung der Hormontherapie ausgewertet, da Therapie oft erst mit zeitlichem Abstand zum Aufenthalt in WBC-Kooperationsklinik erfolgt.

Besonderheiten DMP Brustkrebs: KV Nordrhein und KV Bayern: Bisphosphonattherapie bei Knochenmetastasen. Nur KV Nordrhein: Bestrahlung bei BET zum Berichtszeitpunkt bereits abgeschlossen.

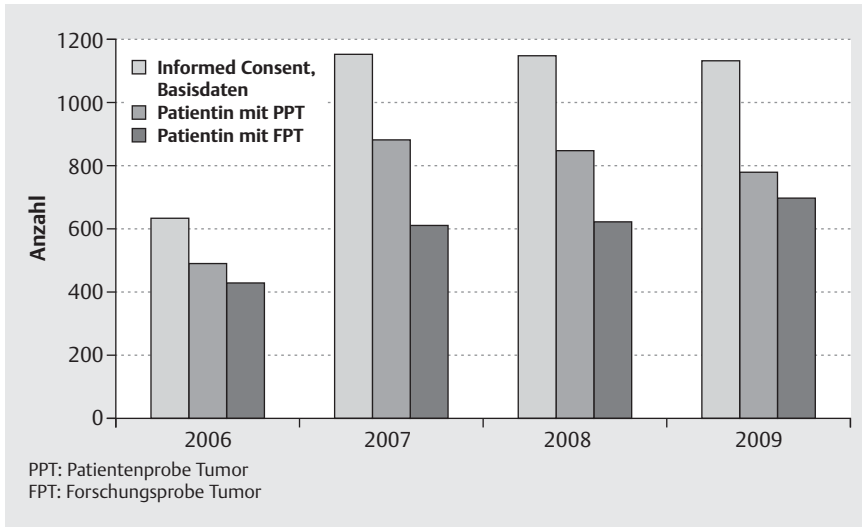

Abb. 2 Anzahl aufgenommener Patientinnen mit Informed Consent und Anzahl eingelagerter Gewebeproben.

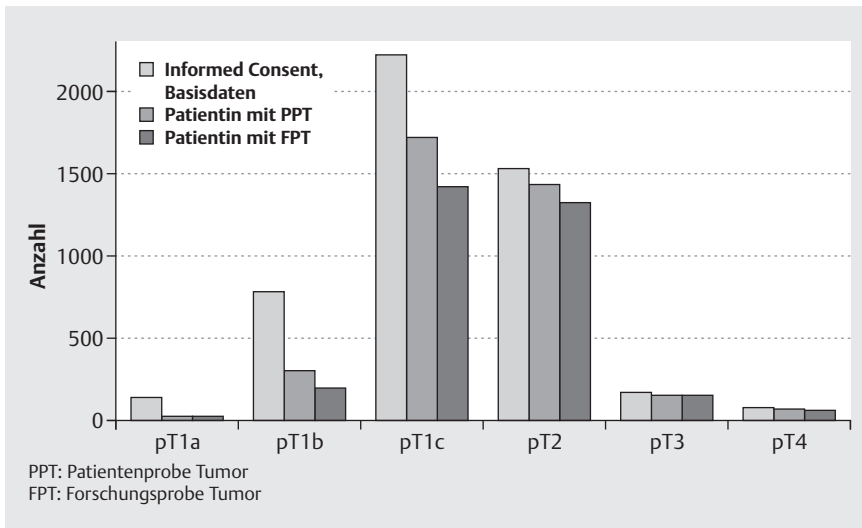

Abb. 3 Anzahl aufgenommener Patientinnen mit Informed Consent und Anzahl eingelagerter Gewebeproben nach Tumorstadium.

Tab. 3 Welche Quellen wurden genutzt, um sich über die eigene Erkrankung zu informieren (Gesamtkollektiv, differenziert nach Anzahl der genutzten Quellen)?

|                             | absolute und relative Häufigkeit der genannten Informationsquellen (1887 Frauen) |                                             | 1–2 Quellen genutzt (1097 Frauen) |                                             | 3 Quellen genutzt (507 Frauen) |                                             | 4–6 Quellen genutzt (283 Frauen) |                                             |
|-----------------------------|----------------------------------------------------------------------------------|---------------------------------------------|-----------------------------------|---------------------------------------------|--------------------------------|---------------------------------------------|----------------------------------|---------------------------------------------|
|                             | Häufigkeit der Nennung                                                           | Prozent bezogen auf Anzahl der Patientinnen | Häufigkeit der Nennung            | Prozent bezogen auf Anzahl der Patientinnen | Häufigkeit der Nennung         | Prozent bezogen auf Anzahl der Patientinnen | Häufigkeit der Nennung           | Prozent bezogen auf Anzahl der Patientinnen |
| Ärztin oder Arzt            | 1683                                                                             | 89,2                                        | 947                               | 86,3                                        | 461                            | 90,9                                        | 275                              | 97,2                                        |
| Broschüren                  | 943                                                                              | 50,0                                        | 259                               | 23,6                                        | 406                            | 80,1                                        | 278                              | 98,2                                        |
| Zeitschriften               | 676                                                                              | 35,8                                        | 179                               | 16,3                                        | 273                            | 53,8                                        | 224                              | 79,2                                        |
| Internet                    | 584                                                                              | 30,9                                        | 153                               | 13,9                                        | 209                            | 41,2                                        | 222                              | 78,4                                        |
| Patientinnenveranstaltungen | 401                                                                              | 21,3                                        | 108                               | 9,8                                         | 132                            | 26,0                                        | 161                              | 56,9                                        |
| weitere Quellen             | 127                                                                              | 6,7                                         | 30                                | 2,7                                         | 40                             | 7,9                                         | 57                               | 20,1                                        |

teilzunehmen und dass diese häufiger für Studien rekrutiert werden können [16–19]. Dies scheint auch für die PATH-Biobank zuzutreffen. Werden alle Frauen, die bislang in PATH aufgenommen wurden, mit den Frauen mit erfolgter Nachbefragung verglichen, zeigt sich kein weiterer Selektionsprozess. Die hier erzielte Response rate von 76% (bzw. 79%) in der Nachbefragung ist etwas niedriger als Raten aus anderen onkologischen Versorgungsforschungsstudien [15, 20–22], kann aber vor dem Hintergrund der Ähnlichkeit von allen Patientinnen und Patientinnen mit Nachbefragung als ausreichend angesehen werden.

Zum Zeitpunkt der Nachbefragung (Abstand zur Diagnose im Mittel 27 Monate) waren 4% der Brustkrebspatientinnen verstorben. Dies entspricht in etwa dem Anteil der nach 1 Jahr verstorbenen Frauen aus der VERDI-Studie [23]. Das im Vergleich etwas günstigere Tumorstadium der PATH-Patientinnen dürfte für das bessere Überleben verantwortlich sein.

### Verlässlichkeit von Patientenangaben zur onkologischen Versorgung

Bedingt durch das dezentral organisierte Gesundheitswesen liegen Daten der einzelnen Versorgungsakteure (wie Kuration, Rehabilitation) in Deutschland in unterschiedlichen Datenbanken vor. Eine Zusammenfassung dieser Daten ist aufgrund einer fehlenden, einheitlichen Personenidentifikationsnummer nicht möglich. Eine Option der umfassenden Beschreibung der Versorgungssituation ist in Patientenbefragungen zu sehen. Bis heute wird jedoch diskutiert, ob Patienten ihre (onkologische) Versorgung valide und reliabel beschreiben können. Verschiedene Untersuchungen zur Test-Retest-Reliabilität von Fragebögen zeigen eine gute bis moderate Reliabilität an, wobei die Zweitbefragung im Zeitraum zwischen wenigen Minuten bis zu einem Jahr durchgeführt wurde [24–30]. Auch die Validität von Patientenangaben zu Diagnostik, Therapie und Rehabilitation konnte in verschiedenen Studien gezeigt werden [31–36].

### Onkologische Versorgung der PATH-Patientinnen

Zum Vergleich der onkologischen Versorgung wurden der WBC-Benchmarkbericht [10] sowie der Qualitätssicherungsbericht des DMP Brustkrebs in Bayern [11] bzw. Nordrhein [12] herangezogen. Diese Berichte wurden aufgrund der regionalen Übereinstimmung mit den 7 PATH-Kooperationskliniken gewählt. Wenn die Daten zur Therapiehäufigkeit der PATH-Patientinnen nicht deutlich von den Daten aus den Berichten abweichen, ist anzunehmen, dass die PATH-Patientinnen nur wenig selektiert bis unselektiert rekrutiert wurden. Die Altersverteilung der PATH-Patientinnen (54%  $\geq$  60 Jahre) ähnelt der der WBC-Patientinnen (58%  $\geq$  60 Jahre). Auch der Anteil der PATH-Frauen mit T1-Tumor, der eine brusterhaltende Therapie erhält, ist vergleichbar mit dem WBC-Wert. Allerdings liegt der Anteil der nachbestrahlten Frauen bei brusterhaltender Therapie im PATH-Kollektiv 5 Prozentpunkte höher als im WBC-Benchmarkbericht sowie im DMP Brustkrebs in Bayern (je 85%) und deutlich höher als im DMP Brustkrebs in Nordrhein (62%). Möglicherweise ist dies auf den Zeitpunkt der Datenerfassung zurückzuführen. So wurden die PATH-Frauen mit einem Mindestabstand von 2 Jahren nach der Diagnosestellung zur Therapie befragt, während im Benchmarkbericht bzw. in den DMP-Berichten die Datenerhebung zeitlich näher an der Diagnosestellung lag und die Dokumentation einer geplanten bzw. noch nicht abgeschlossenen Bestrahlung für die Berechnungen nicht mit berücksichtigt wurde. Besonders deutlich wird dieser Umstand in den Daten aus Nordrhein.

Die Chemotherapie bei Lymphknotenbefall und negativem Hormonrezeptorstatus wird vom PATH-Kollektiv (71%) hingegen seltener als für die Vergleichskollektive (75–78%) berichtet. Ob Patientinnenwünsche oder aber ein anderes Therapieverhalten der behandelnden Ärzte ursächlich sind, kann aufgrund der vorliegenden Daten nicht beurteilt werden.

Von allen befragten PATH-Frauen berichten 17% eine Bisphosphonattherapie. Werden nur die Frauen mit Metastasen (jedweder Lokalisation) berücksichtigt, so steigt der Anteil mit Bisphosphonattherapie auf 60,5%. In den DMP-Qualitätssicherungsberichten wird die Angabe zur Bisphosphonattherapie auf alle Frauen mit Knochenmetastasen bezogen, die mit einer Häufigkeit von  $> 80\%$  deutlich höher liegt als in der Grundgesamtheit aller PATH-Patientinnen.

### Informationsquellen

Die Ergebnisse mehrerer Studien deuten darauf hin, dass ärztliches wie auch nicht ärztliches Personal – danach folgen Printmedien bzw. Bücher – die wichtigsten Quellen für Informationen zu Erkrankung und Therapie sind [37–41]. Während ältere Frauen sich eher auf den Arzt als (einzige) Informationsquelle „verlassen“, neigen jüngere Frauen dazu, mehrere Informationsquellen heranzuziehen, um sich über ihre Erkrankung zu informieren [37]. Beides trifft auch für die PATH-Patientinnen zu.

Die Bedeutung des Internets als Informationsquelle wurde in mehreren Studien mit onkologischen Patienten untersucht. Dabei schwankt die Bedeutung dieser Quelle von rund 10% bis rund 50% aller Krebspatientinnen, die im Internet nach Informationen zur Erkrankung und Therapie suchen [39, 40, 42]. Für die PATH-Patientinnen gilt, dass insbesondere junge Frauen nach Informationen im Internet suchten. Die Gruppe der Internetnutzerinnen ist im Mittel 10 Jahre jünger als die Frauen, die nicht im Internet nach Quellen gesucht hatten. Auch andere Untersuchungen kommen zu dem Schluss, dass insbesondere jüngere Patientinnen das Internet als Informationsquelle heranziehen [43–45].

### Bisherige Verwendung der PATH-Daten für Forschungsprojekte

Im Jahr 2008 erfolgte die erste Probenvergabe. Seitdem hat 1 Gruppe Daten ausgewertet [7] und 8 weitere unterschiedliche Arbeitsgruppen haben mit PATH-Material und Daten gearbeitet [8, 9]. Sowohl Tumor- und Normalgewebe als auch Blutserumproben wurden verwendet. Über eine Vergabe entscheidet der Vorstand der Stiftung PATH, nach Beratung durch das Kuratorium und/oder den wissenschaftlichen Beirat. Qualitative Rückmeldungen zur Beschaffenheit der verschiedenen Proben (z. B. Tumorgehalt, RIN-Werte und andere) lassen auf eine sehr gute Verwendbarkeit schließen. Ebenfalls war die Korrelation der in der Datenbank vorhandenen Daten mit den Ergebnissen aus den Untersuchungen gut möglich. Insgesamt ist seit der 2. Jahreshälfte 2011 ein Anstieg der Anfragen nach Forschungsmaterial zu verzeichnen. Aufgrund des sehr großen zur Verfügung stehenden Gesamtkollektivs und einer umfangreichen Kollektivbeschreibung mit klinischen und biologischen Daten zur Tumorerkrankung, ist es möglich, spezielle Studienprotokolle zu bedienen. Der Aufbau und die Umsetzung der PATH-Biobank erlauben Untersuchungen mit ausreichend großen Fallzahlen an homogenem Probenmaterial. Diese Einschätzung wurde durch die unterschiedlichen, bereits erfolgreich durchgeführten Projekte der zumeist frühen Krebsforschung bestätigt [8, 9]. Bei der Nutzung dieser Proben ist jedoch zu bedenken, dass tendenziell eher Frauen mit prognostisch günstigen Stadien an PATH teilnehmen, dass

aber innerhalb der Gruppe der kleinen Tumorstadien (T1, T2) Gewebeproben für die Forschung eher von Frauen mit größeren Tumorstadien (T1c, T2) zur Verfügung stehen.

### Fazit für die Praxis

Die PATH-Forschungsdatenbank ist mit derzeit knapp 6000 dokumentierten Patientinnen eine bislang noch wenig genutzte Quelle zur Deskription der Versorgung von Patientinnen mit Mammakarzinom. Verglichen mit Daten aus dem Westdeutschen Brust-Centrum und dem DMP Brustkrebs in Bayern bzw. Nordrhein stellen die PATH-Patientinnen eine wenig selektierte Stichprobe dar. Die ergänzenden Informationen und eingelagerten Proben von Serum, Tumor- und tumornahem Normalgewebe werden auf Anfrage und nach Begutachtung des Studienprotokolls zur Verfügung gestellt. Somit bietet sich hier die Möglichkeit aktuelle Fragestellungen zeitnah, also ohne zunächst Patientinnen rekrutieren zu müssen, zu bearbeiten.

### Danksagung

Herzlich gedankt sei allen Patientinnen, die sich bereit erklären, Proben in PATH einzulagern und ihre „Krankheitsgeschichte“ zu teilen. Ohne Ihre Unterstützung wäre die Forschungsarbeit nicht möglich. Außerdem sei allen beteiligten Gynäkologen und Pathologen in den kooperierenden Zentren in Bonn (PATH-Ansprechpartner: Prof. Dr. Uwe-Jochen Göhring, Prof. Dr. Walter Kuhn), Dortmund (PD Dr. Georg Kunz), Bochum/Herne (Prof. Dr. Clemens Tempfer, Dr. H.Y. Ergönc), Kassel (Prof. Dr. Thomas Dimpfl), Marburg (Prof. Dr. Ute-Susann Albert), Offenbach (Prof. Dr. Christian Jackisch) und Regensburg (Prof. Dr. Olaf Ortman; siehe auch <http://www.stiftung-path.org/kooperationspartner/kooperationskliniken>) für ihr Engagement gedankt.

Ohne die finanzielle Unterstützung von Privatpersonen und Unternehmen könnte PATH nicht bestehen. Auch ihnen gilt unser Dank. Zu den Spendern und Sponsoren gehören: Amgen, München, AstraZeneca, Wedel, Hans Anzeneder, Burghausen, Bristol-Myers Squibb, München, Prof. Reinhard Büttner, Universität Bonn, Förderverein Robert Janker Krebsstiftung e.V., Bonn, GlaxoSmithKline, München, Henkel Stiftung, Düsseldorf, MammaMia, das Brustkrebsmagazin, Dr. Patrizia Mikulcik, Bad Homburg, Notare Zimmermann und Hauschild, Düsseldorf, Novartis Pharma, Nürnberg, Pfizer Oncology, Berlin, Pierre Fabre, Freiburg, Revierinitiative Bochum Herne, Roche Pharma, Grenzach, Unterweger Healthcare Communication, Hamburg (siehe auch <http://stiftungpath.org/organisation/foerderer-sponsoren>).

### Interessenkonflikt

Die Stiftung PATH wird in der Finanzierung des Aufbaus und der benötigten Materialien zur Einlagerung der Gewebeproben, sowie zur Pflege der Tumorbank durch Privatpersonen und Unternehmen finanziell unterstützt (siehe oben bzw. <http://stiftung-path.org/organisation/foerderer-sponsoren>). Ein Interessenkonflikt liegt in dieser Arbeit nicht vor, da diese Auswertung durch eine externe und unabhängige Stelle vorgenommen wurde (Institut für Sozialmedizin und Epidemiologie; Institut für Krebs Epidemiologie e. V.). Es gab durch die Privatpersonen und Unternehmen, die PATH unterstützen, keinerlei finanzielle oder nicht fi-

nanzielle Unterstützung bez. dieser Auswertung. Die externe Auswertungsstelle stand in keinerlei Kontakt zu den unterstützenden Unternehmen und Privatpersonen.

### Literatur

- 1 RKI, GEKID. Krebs in Deutschland 2007–2008. Häufigkeiten und Trends. 8. überarbeitete Auflage. Saarbrücken: Robert Koch-Institut und die Gesellschaft der epidemiologischen Krebsregister in Deutschland, Hrsg.; 2012
- 2 Brenner H, Stegmaier C, Ziegler H. Long-term survival of cancer patients in Germany achieved by the beginning of the third millennium. *Ann Oncol* 2005; 16: 981–986
- 3 De Angelis R, Tavilla A, Verdecchia A et al. Breast cancer survivors in the United States: geographic variability and time trends, 2005–2015. *Cancer* 2009; 115: 1954–1966
- 4 Warren JL, Mariotto AB, Meekins A et al. Current and future utilization of services from medical oncologists. *J Clin Oncol* 2008; 26: 3242–3247
- 5 Herpel E, Hummel M. [Research biobanks—development and structure]. *Dtsch Med Wochenschr* 2013; 138: 1069–1072
- 6 Hewitt RE. Biobanking: the foundation of personalized medicine. *Curr Opin Oncol* 2011; 23: 112–119
- 7 Fick E, Anzeneder T, Katalinic A et al. Bisphosphonates and their role in therapy for breast cancer – results from the PATH biobank [Bisphosphonate und ihre Rolle in der Therapie des Mammakarzinoms – Ergebnisse aus der Biobank PATH]. *Geburtsh Frauenheilk* 2013; 73: 412–421
- 8 Gevensleben H, Gohring UJ, Buttner R et al. Comparison of MammaPrint and TargetPrint results with clinical parameters in German patients with early stage breast cancer. *Int J Mol Med* 2010; 26: 837–843
- 9 Kloten V, Becker B, Winner K et al. Promoter hypermethylation of the tumor-suppressor genes ITIH5, DKK3, and RASSF1A as novel biomarkers for blood-based breast cancer screening. *Breast Cancer Res* 2013; 15: R4
- 10 WBC Westdeutsches Brust-Centrum GmbH, Hrsg. Benchmarking WBC. Jahresbericht 2009. Bonn: Mediengestaltung Claus; 2010
- 11 Donnachie E, Hofmann F, Keller M et al., Hrsg. Qualitätsbericht 2010. Disease Management Programme in Bayern. München: 2011
- 12 Hagen B, Altenhofen L, Blaschy S et al., Hrsg. Qualitätssicherungsbericht 2009. Disease-Management-Programme in Nordrhein. Köln-Weiden: Echo VERLAGSGRUPPE GmbH; 2010
- 13 Altman D, Machin D, Bryant TN et al. Statistics with confidence: confidence intervals and statistical guidelines. London: John Wiley & Sons; 2003
- 14 Waldmann A, Pritzkeleit R, Raspe H et al. Guideline-compatible treatment of breast cancer patients: the status quo in Schleswig-Holstein. *Dtsch Arztebl Int* 2008; 105: 337–343
- 15 Arndt V, Merx H, Sturmer T et al. Age-specific detriments to quality of life among breast cancer patients one year after diagnosis. *Eur J Cancer* 2004; 40: 673–680
- 16 Kemeny MM, Peterson BL, Kornblith AB et al. Barriers to clinical trial participation by older women with breast cancer. *J Clin Oncol* 2003; 21: 2268–2275
- 17 Lakerveld J, Ijzelenberg W, van Tulder MW et al. Motives for (not) participating in a lifestyle intervention trial. *BMC Med Res Methodol* 2008; 8: 17
- 18 Pritzkeleit R, Waldmann A, Raspe H et al. The population-based oncological health care study OVIS – recruitment of the patients and analysis of the non-participants. *BMC Cancer* 2008; 8: 311
- 19 Simon MS, Du W, Flaherty L et al. Factors associated with breast cancer clinical trials participation and enrollment at a large academic medical center. *J Clin Oncol* 2004; 22: 2046–2052
- 20 Arndt V, Merx H, Stegmaier C et al. Quality of life in patients with colorectal cancer 1 year after diagnosis compared with the general population: a population-based study. *J Clin Oncol* 2004; 22: 4829–4836
- 21 Lehto US, Ojanen M, Kellokumpu-Lehtinen P. Predictors of quality of life in newly diagnosed melanoma and breast cancer patients. *Ann Oncol* 2005; 16: 805–816
- 22 Karakiewicz PI, Tanguay S, Kattan MW et al. Erectile and urinary dysfunction after radical prostatectomy for prostate cancer in Quebec: a population-based study of 2415 men. *Eur Urol* 2004; 46: 188–194
- 23 Arndt V, Stegmaier C, Ziegler H et al. A population-based study of the impact of specific symptoms on quality of life in women with breast cancer 1 year after diagnosis. *Cancer* 2006; 107: 2496–2503



- 24 *Adelstein B, Irwig L, Macaskill P et al.* A self administered reliable questionnaire to assess lower bowel symptoms. *BMC Gastroenterol* 2008; 8: 8–17
- 25 *Oberst K, Bradley CJ, Schenk M.* Breast and prostate cancer patient's reliability of treatment reporting. *J Registry Manag* 2009; 36: 12–15
- 26 *Penfold RB, Kullgren JT, Miroshnik I et al.* Reliability of a patient survey assessing cost-related changes in health care use among high deductible health plan enrollees. *BMC Health Serv Res* 2011; 11: 133
- 27 *Radbruch L, Sabatowski R, Elsner F et al.* Validation of the German version of the brief fatigue inventory. *J Pain Symptom Manage* 2003; 25: 449–458
- 28 *Renzi C, Mastroeni S, Mannoaranparampil TJ et al.* Reliability of self-reported information on skin cancer among elderly patients with squamous cell carcinoma. *Ann Epidemiol* 2011; 21: 551–554
- 29 *Slanger T, Mutschelknauss E, Kropp S et al.* Test-retest reliability of self-reported reproductive and lifestyle data in the context of a German case-control study on breast cancer and postmenopausal hormone therapy. *Ann Epidemiol* 2007; 17: 993–998
- 30 *Waldmann A, Dreckschmidt J, Pritzkeleit R et al.* Test-Retest Reliabilität des OVIS-Fragebogens – ein Instrument zur Evaluation der onkologischen Versorgung aus Patientensicht. [Test-retest reliability of the OVIS Questionnaire – an instrument to evaluate oncological care from a patient's point of view]. *Gesundheitswesen* 2010; 72: 707–713
- 31 *Greenlaw SM, Yentzer BA, O'Neill JL et al.* Assessing adherence to dermatology treatments: a review of self-report and electronic measures. *Skin Res Technol* 2010; 16: 253–258
- 32 *Gupta V, Gu K, Chen Z et al.* Concordance of self-reported and medical chart information on cancer diagnosis and treatment. *BMC Med Res Methodol* 2011; 11: 72
- 33 *Jones JM, McPherson CJ, Zimmermann C et al.* Assessing agreement between terminally ill cancer patients' reports of their quality of life and family caregiver and palliative care physician proxy ratings. *J Pain Symptom Manage* 2011; 42: 354–365
- 34 *Ritterhoff N.* Wie gut kennen Patienten ihre Krankheit und Behandlung? Ein Vergleich von Patientenangaben, Arztangaben und Registerdaten in der onkologischen Versorgung. Dissertation. Institut für Krebs Epidemiologie e.V., Universität zu Lübeck; 2010
- 35 *Fisher DA, Voils CI, Coffman CJ et al.* Validation of a questionnaire to assess self-reported colorectal cancer screening status using face-to-face administration. *Dig Dis Sci* 2009; 54: 1297–1306
- 36 *McAdams MA, Maynard JW, Baer AN et al.* Reliability and sensitivity of the self-report of physician-diagnosed gout in the campaign against cancer and heart disease and the atherosclerosis risk in the community cohorts. *J Rheumatol* 2011; 38: 135–141
- 37 *Cowan C, Hoskins R.* Information preferences of women receiving chemotherapy for breast cancer. *Eur J Cancer Care* 2007; 16: 543–550
- 38 *Raupach JC, Hiller JE.* Information and support for women following the primary treatment of breast cancer. *Health Expect* 2002; 5: 289–301
- 39 *Nagler RH, Gray SW, Romantan A et al.* Differences in information seeking among breast, prostate, and colorectal cancer patients: results from a population-based survey. *Patient Educ Couns* 2010; 81 (Suppl.): S54–S62
- 40 *Rokade A, Kapoor PK, Rao S et al.* Has the internet overtaken other traditional sources of health information? Questionnaire survey of patients attending ENT outpatient clinics. *Clin Otolaryngol Allied Sci* 2002; 27: 526–528
- 41 *Talosi-Garcia M, Davis SW.* Information-seeking behavior of minority breast cancer patients: an exploratory study. *J Health Commun* 2005; 10 (Suppl. 1): 53–64
- 42 *Satterlund MJ, McCaul KD, Sandgren AK.* Information gathering over time by breast cancer patients. *J Med Internet Res* 2003; 5: e15
- 43 *Mancini J, Nogues C, Adenis C et al.* Patients' characteristics and rate of Internet use to obtain cancer information. *J Public Health (Oxf)* 2006; 28: 235–237
- 44 *Sharpley CF, Christie DR.* Patient information preferences among breast and prostate cancer patients. *Australas Radiol* 2007; 51: 154–158
- 45 *van de Poll-Franse LV, van Eenbergen MC.* Internet use by cancer survivors: current use and future wishes. *Support Care Cancer* 2008; 16: 1189–1195
